# Supplementary material for: Treatment of necrotizing enterocolitis by conditioned medium derived from human amniotic fluid stem cells
Source: PLoS One. 2021 Dec 2;16(12):e0260522. doi: 10.1371/journal.pone.0260522 (PMC8638898; doi:10.1371/journal.pone.0260522)
Supplement: S1 Data — (XLSX) [file pone.0260522.s001.xlsx]

## Sheet: Figure 2
	2A		Days elapsed	Control	NEC+PBS	NEC+CM
		Con1	9.25	0
		Con2	9.25	0
		Con3	9.25	0
		Con4	9.25	0
		Con5	9.25	0
		Con6	9.25	0
		Con7	9.25	0
		Con8	9.25	0
		Con9	9.25	0
		Con10	9.25	0
		Con11	9.25	0
		Pbs1	9.25		0
		Pbs2	9.25		0
		Pbs3	9.25		0
		Pbs4	9.25		0
		Pbs5	7.5		1
		Pbs6	8		1
		Pbs7	8.25		1
		Pbs8	8.5		1
		Pbs9	9.25		0
		Pbs10	7.5		1
		Pbs11	8.25		1
		Pbs12	9.25		0
		Pbs13	9.25		0
		Pbs14	9.25		0
		Pbs15	9.25		0
		Pbs16	9.25		0
		Pbs17	7.25		1
		Pbs18	7.25		1
		Pbs19	7.5		1
		Pbs20	8		1
		Cm1	9.25			0
		Cm2	9.25			0
		Cm3	9.25			0
		Cm4	9.25			0
		Cm5	9.25			0
		Cm6	7.25			1
		Cm7	7.25			1
		Cm8	7.5			1
		Cm9	7.75			1
		Cm10	9.25			0
		Cm11	9.25			0
		Cm12	9.25			0
		Cm13	9.25			0
		Cm14	9.25			0
	2C	Control	NEC+PBS	NEC+CM
		1	2	1
		1	2	2
		0	2	1
		0	3	1
		1	2	1
		1	1	1
		0	2	1
		0	2	2
		1	3	1
		0	2	1
	2D	Control	NEC+PBS	NEC+CM
		1.54923	1.09386	1.31258
		1.35894	2.20134	1.08373
		0.916561	6.22755	1.20049
		0.567244	2.2245	2.01562
		1.37471	2.13725	2.12681
		0.376414	2.03106	1.65991
		1.15125	1.9327	0.80692
		1.28121	7.29571	1.49846
		0.945036	2.18056	1.13545
		0.917329	2.20833	2.60765
		0.565886	2.48404	3.10714
		0.984831	3.52186	1.36311
		0.940208	3.44754	1.24066
		0.541112	1.76928	2.37462
		1.34951	3.8241	1.65919
		0.873734	5.03475	1.30943
		1.54053	3.11064	1.0827
		0.781165	3.01319	1.20042
		0.856195		1.08261
		0.65698		1.05995
	2E	Control	NEC+PBS	NEC+CM
		1.18827	2.73583	1.11484
		0.951642	2.90458	0.922202
		1.17238	2.8202	1.21519
		1.08972	4.87766	1.38519
		0.852512	1.84826	2.67685
		1.04172	3.77149	1.00941
		0.957552	2.87173	1.25672
		0.442004	8.18318	1.52656
		1.10291	1.85222	1.9579
		0.584335	1.92402	2.11201
		1.13057	1.87356	1.11307
		0.752893	1.86187	0.921539
		0.800363	3.78447	1.21802
		1.4117	1.95704	1.78164
		1.13913	2.39592	1.28467
		0.92596	2.85939	2.01675
		1.04372	5.26246	1.46239
		0.865294	4.80863	0.542822
		1.08909		0.54366
		1.45823		1.08549
	2H	Control	NEC+PBS	NEC+CM
		1	4	0
		1	5	0
		0	6	1
		0	1	0
		0	2	1
		0	3	1
		0	0	1
		1	5	0
		0	6	1
		1	1	1
	2I	Control	NEC+PBS	NEC+CM
		2	5	1
		2	8	2
		0	9	1
		0	7	0
		1	6	0
		1	5	0
		1	8	1
		2	6	2
		1	6	1
		0	7	1
	2J	Control	NEC+PBS	NEC+CM
		1.97306	0.2805	0.69419
		3.15113	0.22339	1
		1.87094	0.83371	0.67001
		1.68464	0.23746	0.92405
		2.71611	0.19726	1.23311
		3.18119	0.84986	0.96795
		1.67262	0.70543	1.19636
		3.22738	0.08325	1.34816
		1.92015	0.85358	1.56882
		3.00448	0.64994	0.93101
		2.75311	0.33659	0.90969
		3.29412	0.68623	1.5938
		1.75762	0.71158
		1.15752	0.87083
		1.33631	0.70921
		1.01958	0.59611
		1.21728	0.61616
		3.59654

## Sheet: Figure 3
	3E	Control	NEC+PBS	NEC+CM
		6.64	3.53	8.15
		7.78	5.51	10.7
		6.9	5.03	8
		7.45	5.75	12.7
		8.1	4.65	8.38
		6	5.2	8.93
		6.53	5.85	7.57
		7.05	5.25	10.67
		7.83	4.05	11
		7.46	3.2	8.96
	3F	Control	NEC+PBS	NEC+CM
		1	0.10439	0.25378
		0.27992	0.21896	0.20166
		1.00151	0.17077	0.74561
		0.99611	0.15732	0.99031
		0.98925	0.10119	2.49743
		1.15021	0.17601	0.46947
		2.58289	0.14818	1.00325
			0.27222	2.13597
			0.15349	0.5729
			0.17388
			0.4802
			0.28554
			0.37163
			0.29402
			0.31886
	3G	Control	NEC+PBS	NEC+CM
		1.02497	0.452909	1.90451
		0.736491	0.209845	0.586368
		1.06143	0.075502	2.00641
		0.587416	0.135057	0.97654
		1.18299	0.095032	0.82031
		1.18299	0.589175	0.34418
		0.454605	0.644148	0.394006
		0.495395	0.327243	0.484932
		1.3858	0.431061	6.42647
		1.12171	0.509689	1.18153
		0.497174	0.323804	3.80769
		1.06499	0.451413	1.19577
		0.997118	0.209067	1.07394
		1.19579	0.342611	0.856848
		1.33083	0.459191	1.02064
		0.979617	0.11658	2.21953
		1.3737	0.685222	1.07205
		1.24843	0.171305	0.703618
		1.07857		0.811823
		1.42721		1.54628
